# Supplementary material for: Splenic Artery Ligation: An Ontable Bail-Out Strategy for Small-for-Size Remnants after Major Hepatectomy: A Retrospective Study
Source: MDPI journal article supplement (doi:10.3390/jpm12101687), 2022-10-10
Supplement: s1 [file s1]

## Highlights

- Major hepatectomies may end up to marginal liver remnants
- The mismatching of the remnant volume to the portal vein hemodynamics may end up to the “Small-for-Size Syndrome”
- Portal inflow modulation via splenic artery ligation is a technically simple technique
- It has emerged as an alternative approach to ameliorate the mismatching of the portal vein overflow to the sinusoidal section of the liver remnant
- It can prove useful in the context of major hepatectomies as well as in liver transplantations
- Early evaluation and modification of portal venous pressure post hepatectomy can be used as a practical tool to guide the effect of the intervention

**Figure S1.** PVP, PVF and HAF variation over time.

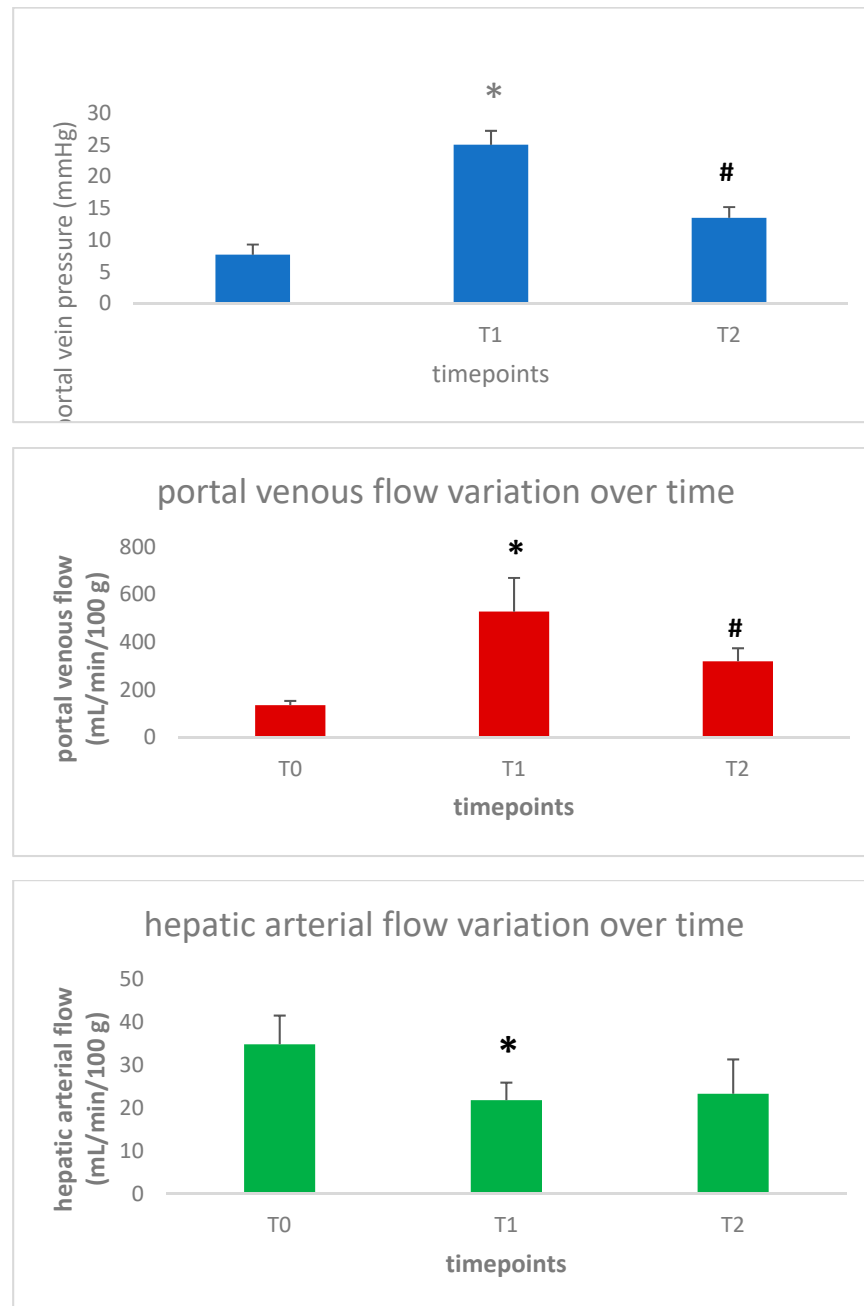

Changes of Portal Vein Pressure (PVP), Portal Vein Flow (PVF) and Hepatic Artery Flow (HAF) before liver resection (T<sub>0</sub>), after reperfusion (T<sub>1</sub>) and after splenic artery ligation (T<sub>2</sub>). Data are depicted as mean (SD). \* $p < 0.001$  in comparison to T<sub>0</sub>; # $p < 0.001$  in comparison to T<sub>1</sub>
